# Supplementary material for: Maternal dietary resveratrol alleviates weaning-associated diarrhea and intestinal inflammation in pig offspring by changing intestinal gene expression and microbiota
Source: Royal Society of Chemistry journal article supplement (doi:10.1039/c9fo00637k), 2019-01-01
Supplement: c9fo00637k1.xlsx [file c9fo00637k1.xlsx]

## Sheet: Sheet1
Supplementary Table 7: DEGs in weaning piglets between Con and Res treatment.
Item	Gene name	Description	Log2(FC)	P-value
1	ENSSSCG00000023993	NA	-1.14889	0.00707778
2	ENSSSCG00000023190	NA	-1.2542	0.00454218
3	SEMA4D	semaphorin 4D [Source:HGNC Symbol;Acc:HGNC:10732]	-1.28568	0.0380499
4	HVCN1	hydrogen voltage gated channel 1 [Source:HGNC Symbol;Acc:HGNC:28240]	-1.51315	0.00114463
5	TESC	tescalcin [Source:HGNC Symbol;Acc:HGNC:26065]	-1.02078	0.0410296
6	ENSSSCG00000009922	NA	-1.05836	0.0448935
7	SEPT5	septin 5 [Source:HGNC Symbol;Acc:HGNC:9164]	-1.38508	0.00616804
8	RASGEF1A	RasGEF domain family member 1A [Source:HGNC Symbol;Acc:HGNC:24246]	-1.39656	0.0019737
9	ENSSSCG00000026923	NA	-2.27026	0.00540311
10	AFAP1L2	actin filament associated protein 1 like 2 [Source:HGNC Symbol;Acc:HGNC:25901]	-1.18487	0.0225525
11	CYTIP	cytohesin 1 interacting protein [Source:HGNC Symbol;Acc:HGNC:9506]	-1.84713	0.029719
12	WIPF1	WAS/WASL interacting protein family member 1 [Source:HGNC Symbol;Acc:HGNC:12736]	-1.43508	0.00486476
13	ICOS	NA	-1.49501	0.0488698
14	ENSSSCG00000016237	NA	-1.2566	0.032819
15	ENSSSCG00000004642	NA	-1.10579	0.0161479
16	FYB	FYN binding protein [Source:HGNC Symbol;Acc:HGNC:4036]	-1.06599	0.0254085
17	CD180	CD180 molecule [Source:HGNC Symbol;Acc:HGNC:6726]	-1.31872	0.0345716
18	ENSSSCG00000017008	NA	-1.25479	0.000830225
19	LCP2	lymphocyte cytosolic protein 2 [Source:HGNC Symbol;Acc:HGNC:6529]	-1.25534	0.00175122
20	ENSSSCG00000022520	NA	-1.06031	0.00359652
21	CNOT8	CCR4-NOT transcription complex subunit 8 [Source:HGNC Symbol;Acc:HGNC:9207]	-1.07474	0.00766871
22	PCNA	proliferating cell nuclear antigen [Source:RefSeq peptide;Acc:NP_001278854]	-1.38787	0.0427311
23	CST3	NA	-1.456	0.0116901
24	SNORA20	Small nucleolar RNA SNORA20 [Source:RFAM;Acc:RF00401]	-1.95337	0.0301884
25	PPP1R16B	protein phosphatase 1 regulatory subunit 16B [Source:HGNC Symbol;Acc:HGNC:15850]	-1.22679	0.00926427
26	ADNP	activity dependent neuroprotector homeobox [Source:HGNC Symbol;Acc:HGNC:15766]	-1.7939	0.0123687
27	ENSSSCG00000026352	NA	-1.00054	0.0472388
28	EPHB6	EPH receptor B6 [Source:HGNC Symbol;Acc:HGNC:3396]	-1.15618	0.0147615
29	ENSSSCG00000016479	NA	-1.322	0.00508043
30	THBS1	thrombospondin 1 [Source:HGNC Symbol;Acc:HGNC:11785]	-1.81985	0.0321442
31	RASGRP1	RAS guanyl releasing protein 1 [Source:HGNC Symbol;Acc:HGNC:9878]	-1.36621	0.0417256
32	LPXN	leupaxin [Source:HGNC Symbol;Acc:HGNC:14061]	-1.70207	0.00506634
33	ENSSSCG00000022393	NA	-2.24641	0.00103374
34	MED19	mediator complex subunit 19 [Source:HGNC Symbol;Acc:HGNC:29600]	-2.33315	0.0241495
35	SYTL3	synaptotagmin like 3 [Source:HGNC Symbol;Acc:HGNC:15587]	-1.06132	0.0157773
36	RASAL3	RAS protein activator like 3 [Source:HGNC Symbol;Acc:HGNC:26129]	-1.38933	0.0112828
37	ENSSSCG00000024211	NA	-1.18208	0.000473614
38	MEF2C	myocyte-specific enhancer factor 2C [Source:RefSeq peptide;Acc:NP_001038005]	-1.67102	0.0389921
39	ENSSSCG00000024806	NA	-1.2232	0.0131544
40	ENSSSCG00000014252	NA	-1.00437	0.00676771
41	ENSSSCG00000025567	NA	-1.11519	0.0232194
42	HIP1	huntingtin interacting protein 1 [Source:HGNC Symbol;Acc:HGNC:4913]	-1.0515	0.0286899
43	SEPT1	septin 1 [Source:HGNC Symbol;Acc:HGNC:2879]	-1.50264	0.000672742
44	ENSSSCG00000024605	NA	-2.91999	0.018553
45	ENSSSCG00000025037	NA	-1.09209	0.00446892
46	NLRC3	NLR family CARD domain containing 3 [Source:HGNC Symbol;Acc:HGNC:29889]	-1.01264	0.00336933
47	ATOH8	atonal bHLH transcription factor 8 [Source:HGNC Symbol;Acc:HGNC:24126]	-1.12591	0.0155002
48	PUM2	pumilio RNA binding family member 2 [Source:HGNC Symbol;Acc:HGNC:14958]	-1.17441	0.00484934
49	ENSSSCG00000027885	NA	-1.26154	0.0144869
50	PPM1A	protein phosphatase, Mg2+/Mn2+ dependent 1A [Source:HGNC Symbol;Acc:HGNC:9275]	-1.44736	0.00810664
51	ENSSSCG00000023440	CDK-activating kinase assembly factor MAT1 [Source:RefSeq peptide;Acc:NP_001159788]	-1.21421	0.0200152
52	SELL	selectin L [Source:HGNC Symbol;Acc:HGNC:10720]	-2.4373	0.0267885
53	XCL1	NA	-1.78979	0.0235656
54	CD247	CD247 molecule [Source:HGNC Symbol;Acc:HGNC:1677]	-1.81782	0.00802569
55	SLAMF7	SLAM family member 7 [Source:HGNC Symbol;Acc:HGNC:21394]	-2.2931	0.0454329
56	CD2	CD2 molecule [Source:HGNC Symbol;Acc:HGNC:1639]	-1.88481	0.0312785
57	CD53	CD53 molecule [Source:HGNC Symbol;Acc:HGNC:1686]	-1.21263	0.0275357
58	ENSSSCG00000006841	NA	-1.32221	0.0163518
59	ENSSSCG00000006851	NA	-1.36811	0.0283932
60	ENSSSCG00000004065	NA	-1.21287	0.0218167
61	SEP15	15 kDa selenoprotein precursor [Source:RefSeq peptide;Acc:NP_001078912]	-1.69263	0.0461171
62	ENSSSCG00000023448	NA	-1.32508	0.00270358
63	ENSSSCG00000028531	NA	-1.64446	0.00777276
64	CSF2RB	colony stimulating factor 2 receptor beta common subunit [Source:HGNC Symbol;Acc:HGNC:2436]	-1.58438	0.0413876
65	ENSSSCG00000022766	NA	-1.11615	0.00718913
66	ITGB7	integrin subunit beta 7 [Source:HGNC Symbol;Acc:HGNC:6162]	-1.48469	0.000776314
67	ARHGDIB	Rho GDP dissociation inhibitor (GDI) beta [Source:HGNC Symbol;Acc:HGNC:679]	-1.10268	3.53944e-05
68	ENSSSCG00000000638	NA	-3.00485	0.00761904
69	ENSSSCG00000000637	NA	-2.99645	0.0227974
70	ENSSSCG00000023520	NA	-1.06201	0.0258472
71	ENSSSCG00000023126	NA	-1.25161	0.0103993
72	FGR	FGR proto-oncogene, Src family tyrosine kinase [Source:HGNC Symbol;Acc:HGNC:3697]	-1.8692	0.0115432
73	CAP1	adenylate cyclase associated protein 1 [Source:HGNC Symbol;Acc:HGNC:20040]	-1.51167	0.00865574
74	ENSSSCG00000027584	NA	-1.26429	0.0386032
75	TAL1	TAL bHLH transcription factor 1, erythroid differentiation factor [Source:HGNC Symbol;Acc:HGNC:11556]	-1.3508	0.0226163
76	SLA-DRB1	NA	-1.37667	0.0139335
77	GNMT	glycine N-methyltransferase [Source:RefSeq peptide;Acc:NP_001103889]	-1.0419	0.0318083
78	RASGRF1	Ras protein specific guanine nucleotide releasing factor 1 [Source:HGNC Symbol;Acc:HGNC:9875]	-1.51252	0.0317235
79	PSTPIP1	proline-serine-threonine phosphatase interacting protein 1 [Source:HGNC Symbol;Acc:HGNC:9580]	-1.48947	0.0129458
80	CFL2	cofilin 2 [Source:HGNC Symbol;Acc:HGNC:1875]	-1.33467	0.0193173
81	ENSSSCG00000024003	NA	-1.17423	0.00381287
82	TRDC	T-cell receptor delta constant [Source:HGNC Symbol;Acc:HGNC:12253]	-2.26906	0.0465724
83	SUSD6	sushi domain containing 6 [Source:HGNC Symbol;Acc:HGNC:19956]	-2.2179	0.00141798
84	ENSSSCG00000002472	NA	-2.24279	0.0162128
85	ENSSSCG00000008733	NA	-3.10011	0.0282746
86	RHOH	ras homolog gene family, member H [Source:RefSeq peptide;Acc:NP_001231718]	-1.12017	0.0262045
87	HADH	Hydroxyacyl-coenzyme A dehydrogenase, mitochondrial [Source:UniProtKB/Swiss-Prot;Acc:P00348]	-1.15253	0.0301025
88	CDS1	CDP-diacylglycerol synthase 1 [Source:HGNC Symbol;Acc:HGNC:1800]	-1.99192	0.0343826
89	CD3E	CD3e molecule, epsilon (CD3-TCR complex) [Source:HGNC Symbol;Acc:HGNC:1674]	-2.24223	0.011734
90	JAML	junction adhesion molecule like [Source:HGNC Symbol;Acc:HGNC:19084]	-1.59948	0.0146392
91	CD3D	T-cell surface glycoprotein CD3 delta chain [Source:UniProtKB/Swiss-Prot;Acc:Q764N2]	-3.08827	0.00173867
92	CD3G	CD3g molecule [Source:HGNC Symbol;Acc:HGNC:1675]	-1.64386	0.0286061
93	ETS1	ETS proto-oncogene 1, transcription factor [Source:HGNC Symbol;Acc:HGNC:3488]	-3.03309	0.00147484
94	ENSSSCG00000024457	NA	-1.21203	0.0406682
95	IL10	interleukin 10 [Source:HGNC Symbol;Acc:HGNC:5962]	-1.02855	0.0160522
96	TRGV11	T-cell receptor gamma variable 11 (non-functional) [Source:HGNC Symbol;Acc:HGNC:12286]	-1.93833	0.00327498
97	ZNF398	zinc finger protein 398 [Source:HGNC Symbol;Acc:HGNC:18373]	-2.78829	0.0339881
98	OGT	O-linked N-acetylglucosamine (GlcNAc) transferase [Source:HGNC Symbol;Acc:HGNC:8127]	-1.07979	0.0430045
99	P2RY10	purinergic receptor P2Y10 [Source:HGNC Symbol;Acc:HGNC:19906]	-1.14056	0.0446576
100	RAB33A	RAB33A, member RAS oncogene family [Source:HGNC Symbol;Acc:HGNC:9773]	-1.02928	0.0234915
101	H3F3A	Histone H3.3 [Source:UniProtKB/Swiss-Prot;Acc:Q71LE2]	-1.84833	0.0041892
102	ENSSSCG00000010908	NA	-1.16357	0.0284361
103	PIP4K2A	phosphatidylinositol-5-phosphate 4-kinase type 2 alpha [Source:HGNC Symbol;Acc:HGNC:8997]	-1.16349	0.00821053
104	TAF3	TATA-box binding protein associated factor 3 [Source:HGNC Symbol;Acc:HGNC:17303]	-1.10615	0.04717
105	PRKCQ	protein kinase C theta [Source:HGNC Symbol;Acc:HGNC:9410]	-1.07043	0.0491169
106	LCP1	lymphocyte cytosolic protein 1 [Source:HGNC Symbol;Acc:HGNC:6528]	-1.83142	0.0204039
107	ENSSSCG00000027914	NA	-1.72794	0.007345
108	ENSSSCG00000020890	NA	-1.90253	0.0213135
109	CCL5	C-C motif chemokine ligand 5 [Source:HGNC Symbol;Acc:HGNC:10632]	-1.04574	0.00939899
110	NF1	neurofibromin 1 [Source:HGNC Symbol;Acc:HGNC:7765]	-1.64251	0.0332296
111	ITGAE	integrin subunit alpha E [Source:HGNC Symbol;Acc:HGNC:6147]	-1.20737	0.00303854
112	NCBP3	nuclear cap binding subunit 3 [Source:HGNC Symbol;Acc:HGNC:24612]	-1.3907	0.0317459
113	ENSSSCG00000011245	NA	-1.37749	0.00922642
114	SS18L2	SS18 like 2 [Source:HGNC Symbol;Acc:HGNC:15593]	-1.39848	0.0210951
115	ENSSSCG00000004350	NA	-1.06214	0.0493753
116	ARHGEF3	Rho guanine nucleotide exchange factor 3 [Source:HGNC Symbol;Acc:HGNC:683]	-1.01249	0.00275596
117	RPP14	ribonuclease P/MRP subunit p14 [Source:HGNC Symbol;Acc:HGNC:30327]	-1.46394	0.0458445
118	RASA2	RAS p21 protein activator 2 [Source:HGNC Symbol;Acc:HGNC:9872]	-1.80897	0.0360048
119	KLHL6	kelch like family member 6 [Source:HGNC Symbol;Acc:HGNC:18653]	-1.72456	7.1571e-05
120	ENSSSCG00000022220	NA	1.16249	0.0303855
121	GTPBP8	GTP binding protein 8 (putative) [Source:HGNC Symbol;Acc:HGNC:25007]	1.88734	0.004491
122	ENSSSCG00000022632	NA	1.21629	0.0428226
123	DSCR3	DSCR3 arrestin fold containing [Source:HGNC Symbol;Acc:HGNC:3044]	1.13102	0.0252996
124	MX1	MX dynamin like GTPase 1 [Source:HGNC Symbol;Acc:HGNC:7532]	2.42678	0.0408528
125	ENSSSCG00000009598	NA	1.22787	0.0269372
126	ENSSSCG00000027496	NA	1.14524	0.00338745
127	TRIAP1	TP53 regulated inhibitor of apoptosis 1 [Source:HGNC Symbol;Acc:HGNC:26937]	1.28186	0.0224279
128	CHCHD10	coiled-coil-helix-coiled-coil-helix domain containing 10 [Source:HGNC Symbol;Acc:HGNC:15559]	1.14475	0.0428559
129	ZNF70	zinc finger protein 70 [Source:HGNC Symbol;Acc:HGNC:13140]	1.59611	0.000561613
130	SLC29A3	solute carrier family 29 member 3 [Source:HGNC Symbol;Acc:HGNC:23096]	1.10599	0.0185503
131	MICU1	mitochondrial calcium uptake 1 [Source:HGNC Symbol;Acc:HGNC:1530]	1.08923	0.0163782
132	ENSSSCG00000023681	NA	1.0412	0.019194
133	ENSSSCG00000030365	NA	1.4003	0.0495336
134	ENSSSCG00000028479	NA	1.1046	0.0165604
135	ENSSSCG00000024263	NA	1.90967	0.00812174
136	SIGLEC1	NA	1.46101	0.044655
137	CHAC1	ChaC glutathione specific gamma-glutamylcyclotransferase 1 [Source:HGNC Symbol;Acc:HGNC:28680]	1.65309	0.0135075
138	ENSSSCG00000004781	NA	1.27826	0.0163225
139	UBE2D4	ubiquitin conjugating enzyme E2 D4 (putative) [Source:HGNC Symbol;Acc:HGNC:21647]	1.12027	0.0290811
140	CH242-363D24.1	NA	1.17938	0.0185253
141	ENSSSCG00000021340	NA	1.11772	0.04962
142	SLC39A13	solute carrier family 39 member 13 [Source:HGNC Symbol;Acc:HGNC:20859]	1.29202	0.0227788
143	F2	coagulation factor II (thrombin) [Source:HGNC Symbol;Acc:HGNC:3535]	1.33627	0.0200182
144	HSH2D	hematopoietic SH2 domain containing [Source:HGNC Symbol;Acc:HGNC:24920]	2.5381	0.00276562
145	PGLYRP2	N-acetylmuramoyl-L-alanine amidase precursor [Source:RefSeq peptide;Acc:NP_998903]	1.11606	0.0331992
146	GADD45GIP1	GADD45G interacting protein 1 [Source:HGNC Symbol;Acc:HGNC:29996]	2.31254	0.0495722
147	ARID3A	AT-rich interaction domain 3A [Source:HGNC Symbol;Acc:HGNC:3031]	1.40884	0.0457147
148	ENSSSCG00000014342	NA	1.5952	0.000164109
149	ENSSSCG00000021903	NA	5.11399	0.0340823
150	C15orf61	chromosome 15 open reading frame 61 [Source:HGNC Symbol;Acc:HGNC:34453]	1.5174	0.015158
151	HSPB1	Heat shock protein beta-1 [Source:UniProtKB/Swiss-Prot;Acc:Q5S1U1]	2.10742	0.0421956
152	ENSSSCG00000028568	Heat shock protein beta-1 [Source:UniProtKB/Swiss-Prot;Acc:Q5S1U1]	2.04256	0.00551712
153	ENSSSCG00000008383	NA	1.1854	0.0141432
154	ENSSSCG00000024297	NA	1.18775	0.0197992
155	CEBPZOS	CEBPZ opposite strand [Source:HGNC Symbol;Acc:HGNC:49288]	2.02943	0.00930023
156	ENSSSCG00000006455	NA	2.1499	0.0407855
157	APOA1BP	NA	1.31791	0.0240765
158	S100A12	Protein S100-A12 [Source:UniProtKB/Swiss-Prot;Acc:P80310]	1.49021	0.00193298
159	IFT27	intraflagellar transport 27 [Source:HGNC Symbol;Acc:HGNC:18626]	1.4864	0.0114131
160	ENSSSCG00000022796	NA	2.26308	0.00497806
161	SRGAP1	SLIT-ROBO Rho GTPase activating protein 1 [Source:HGNC Symbol;Acc:HGNC:17382]	1.93224	0.00354752
162	ENSSSCG00000022423	NA	1.03736	0.0102498
163	C19orf68	chromosome 19 open reading frame 68 [Source:HGNC Symbol;Acc:HGNC:34495]	1.02063	0.00927525
164	NUCB1	nucleobindin 1 [Source:HGNC Symbol;Acc:HGNC:8043]	1.02329	0.0353603
165	IL4I1	interleukin 4 induced 1 [Source:HGNC Symbol;Acc:HGNC:19094]	1.48689	0.031807
166	ENSSSCG00000029156	NA	1.86297	0.0106901
167	TINAGL1	tubulointerstitial nephritis antigen like 1 [Source:HGNC Symbol;Acc:HGNC:19168]	1.15002	0.00640678
168	GMPR	guanosine monophosphate reductase [Source:HGNC Symbol;Acc:HGNC:4376]	1.12291	0.0499256
169	B3GALT4	beta-1,3-galactosyltransferase 4 [Source:HGNC Symbol;Acc:HGNC:919]	2.23908	0.00196164
170	ENSSSCG00000030073	NA	1.07271	0.0202062
171	ENSSSCG00000001844	NA	1.74323	0.0418258
172	ENSSSCG00000001919	NA	1.5474	0.0357377
173	ARG2	arginase 2 [Source:HGNC Symbol;Acc:HGNC:664]	1.59856	0.0272302
174	ICK	intestinal cell kinase [Source:HGNC Symbol;Acc:HGNC:21219]	1.07468	0.00792261
175	ENSSSCG00000008773	NA	1.12173	0.0134374
176	ENSSSCG00000030548	NA	2.04827	0.0137858
177	MRPL17	mitochondrial ribosomal protein L17 [Source:HGNC Symbol;Acc:HGNC:14053]	1.09944	0.0313432
178	CRYAB	crystallin alpha B [Source:HGNC Symbol;Acc:HGNC:2389]	1.41351	0.0240537
179	CYTB	cytochrome b (mitochondrion) [Source:RefSeq peptide;Acc:NP_008646]	13.4199	0.033373
180	NDUFB11	NADH:ubiquinone oxidoreductase subunit B11 [Source:HGNC Symbol;Acc:HGNC:20372]	2.48188	0.00282387
181	MEIG1	meiosis/spermiogenesis associated 1 [Source:HGNC Symbol;Acc:HGNC:23429]	1.06986	0.0170708
182	URAD	ureidoimidazoline (2-oxo-4-hydroxy-4-carboxy-5-) decarboxylase [Source:HGNC Symbol;Acc:HGNC:17785]	1.04517	0.00421259
183	DHX58	DExH-box helicase 58 [Source:HGNC Symbol;Acc:HGNC:29517]	1.41011	0.00565589
184	TAC4	tachykinin 4 (hemokinin) [Source:HGNC Symbol;Acc:HGNC:16641]	1.72974	0.043499
185	PTRH2	peptidyl-tRNA hydrolase 2 [Source:HGNC Symbol;Acc:HGNC:24265]	2.2295	0.0151678
186	ENSSSCG00000017924	NA	1.04241	0.0393194
187	RNASEK	ribonuclease K [Source:HGNC Symbol;Acc:HGNC:33911]	1.35477	0.00129811
188	LTF	lactotransferrin precursor [Source:RefSeq peptide;Acc:NP_999527]	1.62642	0.0360912
189	ENSSSCG00000026073	NA	1.35064	0.0303135
