# Supplementary material for: Maternal dietary resveratrol alleviates weaning-associated diarrhea and intestinal inflammation in pig offspring by changing intestinal gene expression and microbiota
Source: Royal Society of Chemistry journal article supplement (doi:10.1039/c9fo00637k), 2019-01-01
Supplement: c9fo00637k2.xlsx [file c9fo00637k2.xlsx]

## Sheet: Down
Supplementary Table 8: DEGs in post-weaning piglets between Con and Res treatment.
Item	Gene name	Description	Log2 (FC)	P-value
1	NUGGC	nuclear GTPase, germinal center associated [Source:HGNC Symbol;Acc:HGNC:33550]	-2.72909	0.0086553
2	RASAL1	RAS protein activator like 1 [Source:HGNC Symbol;Acc:HGNC:9873]	-1.33525	0.0489922
3	OAZ2	ornithine decarboxylase antizyme 2 isoform 1 [Source:RefSeq peptide;Acc:NP_001116467]	-1.39397	0.00420391
4	ENSSSCG00000030019	NA	-1.02219	0.0186087
5	CXCR4	C-X-C chemokine receptor type 4 [Source:UniProtKB/Swiss-Prot;Acc:Q764M9]	-1.33628	0.00761382
6	ENSSSCG00000004579	NA	-1.24537	0.037864
7	ENSSSCG00000016303	NA	-3.99625	0.0250469
8	ENSSSCG00000004642	NA	-1.16398	0.0307806
9	GZMA	NA	-1.49355	0.0037438
10	GZMA	granzyme A [Source:HGNC Symbol;Acc:HGNC:4708]	-1.34833	0.0323794
11	ENSSSCG00000016992	NA	-1.29581	0.00289356
12	TRBV15	T-cell receptor beta variable 15 [Source:HGNC Symbol;Acc:HGNC:12190]	-1.36634	0.00872434
13	CD44	CD44 molecule (Indian blood group) [Source:HGNC Symbol;Acc:HGNC:1681]	-1.29158	0.0167241
14	S1PR2	sphingosine-1-phosphate receptor 2 [Source:HGNC Symbol;Acc:HGNC:3169]	-1.56035	0.0390516
15	CD209	NA	-1.72697	0.0244978
16	IRF1	Interferon regulatory factor 1 [Source:UniProtKB/Swiss-Prot;Acc:A0FIN4]	-1.448	0.0197306
17	PAIP2	poly(A) binding protein interacting protein 2 [Source:HGNC Symbol;Acc:HGNC:17970]	-1.00473	0.0368613
18	ENSSSCG00000007655	NA	-1.20463	0.014657
19	ENSSSCG00000007794	NA	-1.05622	0.0338456
20	RHOB	ras homolog family member B [Source:HGNC Symbol;Acc:HGNC:668]	-3.95564	0.0104806
21	FCER1G	High affinity immunoglobulin epsilon receptor subunit gamma [Source:UniProtKB/Swiss-Prot;Acc:Q9XSZ6]	-1.3585	0.00162191
22	CD48	CD48 molecule [Source:HGNC Symbol;Acc:HGNC:1683]	-1.01582	0.00548614
23	SLAMF7	SLAM family member 7 [Source:HGNC Symbol;Acc:HGNC:21394]	-1.71165	0.00930232
24	ENSSSCG00000006455	NA	-1.88136	0.0213259
25	GBP2	NA	-1.24088	0.0283658
26	GBP1	NA	-1.26642	0.0153016
27	NAP1L1	nucleosome assembly protein 1 like 1 [Source:HGNC Symbol;Acc:HGNC:7637]	-1.05374	0.00611681
28	ENSSSCG00000000884	NA	-1.08866	0.0179776
29	CD72	CD72 molecule [Source:HGNC Symbol;Acc:HGNC:1696]	-1.37581	0.0144468
30	HIPK4	homeodomain interacting protein kinase 4 [Source:HGNC Symbol;Acc:HGNC:19007]	-1.0907	0.00904077
31	ANP32B	acidic nuclear phosphoprotein 32 family member B [Source:HGNC Symbol;Acc:HGNC:16677]	-1.08611	0.0103715
32	TNFRSF4	TNF receptor superfamily member 4 [Source:HGNC Symbol;Acc:HGNC:11918]	-1.58665	0.0079397
33	ENSSSCG00000003330	NA	-1.41886	0.0115429
34	PLA2G2D	phospholipase A2 group IID [Source:HGNC Symbol;Acc:HGNC:9033]	-3.43314	0.0105559
35	FAM167B	family with sequence similarity 167 member B [Source:HGNC Symbol;Acc:HGNC:28133]	-1.08935	0.0433945
36	ENSSSCG00000030423	NA	-1.7666	0.0109522
37	ENSSSCG00000021201	serpin B9 [Source:RefSeq peptide;Acc:NP_001104726]	-1.0588	0.0132315
38	E2F3	E2F transcription factor 3 [Source:HGNC Symbol;Acc:HGNC:3115]	-1.33464	0.0186088
39	HIST1H1B	histone cluster 1 H1 family member b [Source:HGNC Symbol;Acc:HGNC:4719]	-1.22483	0.00235782
40	C4A	NA	-1.13788	0.00651256
41	ENSSSCG00000001778	NA	-1.16403	0.000551054
42	EMC9	ER membrane protein complex subunit 9 [Source:HGNC Symbol;Acc:HGNC:20273]	-1.33256	0.00691245
43	BATF	basic leucine zipper transcription factor, ATF-like [Source:HGNC Symbol;Acc:HGNC:958]	-1.02908	0.0234231
44	CALM1	calmodulin 2 (phosphorylase kinase, delta) [Source:HGNC Symbol;Acc:HGNC:1445]	-1.92407	0.00110371
45	RCOR1	REST corepressor 1 [Source:HGNC Symbol;Acc:HGNC:17441]	-1.09245	0.0289135
46	ENSSSCG00000008900	NA	-1.49143	0.0495215
47	CXCL13	C-X-C motif chemokine ligand 13 [Source:HGNC Symbol;Acc:HGNC:10639]	-3.2931	0.0383091
48	H2AFZ	H2A histone family member Z [Source:HGNC Symbol;Acc:HGNC:4741]	-1.12267	0.0174189
49	ENSSSCG00000023333	NA	-1.82527	0.0078589
50	ENSSSCG00000029414	NA	-1.46809	0.0271511
51	CTSC	cathepsin C [Source:HGNC Symbol;Acc:HGNC:2528]	-1.15371	0.0471822
52	MMP12	matrix metallopeptidase 12 [Source:HGNC Symbol;Acc:HGNC:7158]	-1.36179	0.00580568
53	IL10RA	NA	-1.00099	0.0346434
54	EI24	EI24, autophagy associated transmembrane protein [Source:HGNC Symbol;Acc:HGNC:13276]	-1.0164	0.0141685
55	ARMC10	NA	-1.10898	0.00362919
56	ENSSSCG00000018076	NA	-2.22249	0.00524195
57	TIMP1	TIMP metallopeptidase inhibitor 1 [Source:HGNC Symbol;Acc:HGNC:11820]	-1.03236	0.0252122
58	CXCR3	C-X-C motif chemokine receptor 3 [Source:HGNC Symbol;Acc:HGNC:4540]	-1.02618	0.0331948
59	ENSSSCG00000012427	NA	-4.05928	0.0238598
60	RPL21	ribosomal protein L21 [Source:HGNC Symbol;Acc:HGNC:10313]	-1.08801	0.022271
61	CCR7	C-C motif chemokine receptor 7 [Source:HGNC Symbol;Acc:HGNC:1608]	-1.28324	0.0372202
62	TOP2A	DNA topoisomerase 2-alpha [Source:UniProtKB/Swiss-Prot;Acc:O46374]	-1.04783	0.0160837
63	NOS2	nitric oxide synthase 2 [Source:HGNC Symbol;Acc:HGNC:7873]	-2.09412	0.0277862
64	snoZ17	Small nucleolar RNA Z17 [Source:RFAM;Acc:RF00266]	-1.08861	0.0133951
65	FLOT2	flotillin 2 [Source:HGNC Symbol;Acc:HGNC:3758]	-1.02484	0.0449675
66	EMC6	ER membrane protein complex subunit 6 [Source:HGNC Symbol;Acc:HGNC:28430]	-1.22441	0.0179216
67	CLEC3B	C-type lectin domain family 3 member B [Source:HGNC Symbol;Acc:HGNC:11891]	-2.19833	0.0108346
68	ENSSSCG00000011837	NA	2.0917	0.00416445
69	ENSSSCG00000030362	NA	1.24342	0.0490693
70	ENSSSCG00000028137	NA	1.58066	0.00317667
71	ENSSSCG00000022602	NA	1.26782	0.0443182
72	OSBP2	oxysterol binding protein 2 [Source:HGNC Symbol;Acc:HGNC:8504]	1.44902	0.0167801
73	GGT5	gamma-glutamyltransferase 5 [Source:HGNC Symbol;Acc:HGNC:4260]	1.66228	0.0187246
74	ENSSSCG00000010464	NA	2.02862	0.0173631
75	CYBRD1	cytochrome b reductase 1 [Source:HGNC Symbol;Acc:HGNC:20797]	2.83062	0.0229061
76	ENSSSCG00000029867	NA	1.70678	0.0333463
77	SLC30A4	solute carrier family 30 member 4 [Source:HGNC Symbol;Acc:HGNC:11015]	1.0332	0.00572504
78	ENSSSCG00000004043	NA	1.00134	0.0489588
79	ENSSSCG00000025016	NA	1.23723	0.00229938
80	SPEF1	sperm flagellar 1 [Source:HGNC Symbol;Acc:HGNC:15874]	1.41929	0.02176
81	ENSSSCG00000021795	NA	1.14308	0.0345717
82	ENSSSCG00000007459	NA	1.0881	0.0460842
83	SLC46A1	NA	1.9313	0.0376774
84	SLC25A45	solute carrier family 25 member 45 [Source:HGNC Symbol;Acc:HGNC:27442]	1.10181	0.0304157
85	TTC9C	tetratricopeptide repeat domain 9C [Source:HGNC Symbol;Acc:HGNC:28432]	1.12495	0.0164667
86	ENSSSCG00000013842	NA	1.16266	0.016291
87	PGLYRP2	N-acetylmuramoyl-L-alanine amidase precursor [Source:RefSeq peptide;Acc:NP_998903]	1.00553	0.0111354
88	ARID3A	AT-rich interaction domain 3A [Source:HGNC Symbol;Acc:HGNC:3031]	1.10752	0.0351186
89	MAML1	mastermind like transcriptional coactivator 1 [Source:HGNC Symbol;Acc:HGNC:13632]	1.25054	0.0221375
90	KLHL3	kelch like family member 3 [Source:HGNC Symbol;Acc:HGNC:6354]	1.17377	0.0354022
91	EMP2	epithelial membrane protein 2 [Source:HGNC Symbol;Acc:HGNC:3334]	1.17157	0.0400085
92	ENSSSCG00000021359	NA	1.00015	0.0197118
93	ENSSSCG00000008490	NA	1.72498	0.00988722
94	SLC5A6	solute carrier family 5 member 6 [Source:HGNC Symbol;Acc:HGNC:11041]	1.1096	0.0321389
95	CHMP4C	charged multivesicular body protein 4C [Source:HGNC Symbol;Acc:HGNC:30599]	1.23957	0.00122707
96	SDR16C5	short chain dehydrogenase/reductase family 16C member 5 [Source:HGNC Symbol;Acc:HGNC:30311]	1.98599	0.0285013
97	RXRG	retinoid X receptor gamma [Source:HGNC Symbol;Acc:HGNC:10479]	1.47243	0.00602323
98	TNFAIP8L2	TNF alpha induced protein 8 like 2 [Source:HGNC Symbol;Acc:HGNC:26277]	1.4828	6.05423e-05
99	ACP6	acid phosphatase 6, lysophosphatidic [Source:HGNC Symbol;Acc:HGNC:29609]	1.02016	0.00780229
100	OLFML3	olfactomedin like 3 [Source:HGNC Symbol;Acc:HGNC:24956]	1.05007	0.0165116
101	ENSSSCG00000020981	NA	1.01294	0.0119701
102	ENSSSCG00000000214	NA	1.23939	0.0194202
103	RDH5	retinol dehydrogenase 5 [Source:HGNC Symbol;Acc:HGNC:9940]	1.20715	0.0061278
104	ENSSSCG00000030142	NA	1.15205	0.00658423
105	ENSSSCG00000023305	NA	5.9346	0.0120373
106	ENSSSCG00000023601	NA	1.19717	0.0297181
107	ENSSSCG00000005358	NA	1.32369	0.000727883
108	ENSSSCG00000027204	NA	1.19204	0.047781
109	TUBB6	tubulin beta 6 class V [Source:HGNC Symbol;Acc:HGNC:20776]	1.69277	0.0142226
110	ENSSSCG00000028896	NA	2.08014	0.0250713
111	HYI	hydroxypyruvate isomerase (putative) [Source:HGNC Symbol;Acc:HGNC:26948]	1.05089	0.0142545
112	RNF183	ring finger protein 183 [Source:HGNC Symbol;Acc:HGNC:28721]	1.21731	0.0024397
113	ENSSSCG00000001177	NA	1.4627	0.00988722
114	APOM	Apolipoprotein M [Source:UniProtKB/Swiss-Prot;Acc:Q2LE37]	1.13661	0.00194611
115	MEA1	male-enhanced antigen 1 [Source:HGNC Symbol;Acc:HGNC:6986]	1.14544	0.000524656
116	ENSSSCG00000027799	NA	1.67552	0.000545439
117	ABHD4	abhydrolase domain containing 4 [Source:HGNC Symbol;Acc:HGNC:20154]	1.99853	0.00795078
118	ENSSSCG00000002359	NA	1.29081	0.0228544
119	LRAT	lecithin retinol acyltransferase (phosphatidylcholine--retinol O-acyltransferase) [Source:HGNC Symbol;Acc:HGNC:6685]	1.15958	0.0402895
120	PHPT1	phosphohistidine phosphatase 1 [Source:HGNC Symbol;Acc:HGNC:30033]	1.82409	0.0171138
121	ENSSSCG00000009129	NA	1.06905	0.00988722
122	ND2	NADH dehydrogenase subunit 2 (mitochondrion) [Source:RefSeq peptide;Acc:NP_008635]	4.37199	0.0496662
123	S100G	S100 calcium binding protein G [Source:HGNC Symbol;Acc:HGNC:1436]	2.57159	0.0445139
124	GDPD2	glycerophosphodiester phosphodiesterase domain containing 2 [Source:HGNC Symbol;Acc:HGNC:25974]	1.02107	0.0240583
125	GJB1	gap junction protein beta 1 [Source:HGNC Symbol;Acc:HGNC:4283]	1.48741	0.00475843
126	CH242-51E15.1	NA	2.87416	3.58762e-05
127	ENSSSCG00000025075	NA	1.25974	0.00582897
128	GHDC	NA	1.60862	0.0357237
129	CHAD	chondroadherin [Source:HGNC Symbol;Acc:HGNC:1909]	1.16409	0.0429123
130	ENSSSCG00000004284	NA	1.11386	0.0136523
131	C17orf78	chromosome 17 open reading frame 78 [Source:HGNC Symbol;Acc:HGNC:26831]	1.99439	0.0365883
132	ENSSSCG00000023478	NA	1.43923	0.0394727
133	ENSSSCG00000026275	NA	1.56338	0.042851
134	TM4SF5	transmembrane 4 L six family member 5 [Source:HGNC Symbol;Acc:HGNC:11857]	1.00145	0.0037937
135	SS18L2	SS18 like 2 [Source:HGNC Symbol;Acc:HGNC:15593]	1.22039	0.0106361
136	SNRK	SNF related kinase [Source:HGNC Symbol;Acc:HGNC:30598]	1.57936	0.0340801
137	ENSSSCG00000025421	NA	1.0332	0.016413
138	GLYCTK	glycerate kinase [Source:HGNC Symbol;Acc:HGNC:24247]	1.91202	0.00522669
139	BHLHE40	basic helix-loop-helix family member e40 [Source:HGNC Symbol;Acc:HGNC:1046]	1.06276	0.047295
