# Supplementary material for: Maternal dietary resveratrol alleviates weaning-associated diarrhea and intestinal inflammation in pig offspring by changing intestinal gene expression and microbiota
Source: Royal Society of Chemistry journal article supplement (doi:10.1039/c9fo00637k), 2019-01-01
Supplement: c9fo00637k3.xlsx [file c9fo00637k3.xlsx]

## Sheet: GO analysis
Supplementary Table 9: GO enrichment analysis of DEGs in weaning piglets.
Item	GO_ID	GO Term	GO function	Genes	Gene number	P-value
1	GO:0005737	cytoplasm	cellular component	AFAP1L2;ARHGDIB;ATOH8;CAP1;CCL5;CD247;CFL2;CHAC1;CRYAB;CYTIP;DHX58;ENSSSCG00000004781;ENSSSCG00000009922;ENSSSCG00000024003;ENSSSCG00000024211;ENSSSCG00000025567;ENSSSCG00000028531;ENSSSCG00000028568;HADH;HIP1;HSPB1;ICK;KLHL6;LCP1;LPXN;LTF;MEF2C;MX1;NCBP3;NF1;NLRC3;PRKCQ;RASA2;RASAL3;RHOH;S100A12;SRGAP1;TESC;TINAGL1	39	0.0312224
2	GO:0005622	intracellular	cellular component	ARHGEF3;CFL2;CNOT8;ENSSSCG00000004065;ENSSSCG00000006851;ENSSSCG00000009598;ENSSSCG00000016237;ENSSSCG00000017008;ENSSSCG00000022423;ENSSSCG00000022520;ENSSSCG00000025037;ENSSSCG00000026352;ENSSSCG00000027496;MRPL17;PRKCQ;RAB33A;RASGEF1A;ZNF398	18	0.0296046
3	GO:0009897	external side of plasma membrane	cellular component	CD2;CD3E;ITGAE;SELL;THBS1;TRDC	6	0.00368245
4	GO:0005856	cytoskeleton	cellular component	CFL2;ENSSSCG00000025567;ENSSSCG00000028568;FGR;HSPB1;S100A12	6	0.0111205
5	GO:0015629	actin cytoskeleton	cellular component	CFL2;FGR;FYB;LCP1;WIPF1	5	0.00759464
6	GO:0042105	alpha-beta T cell receptor complex	cellular component	CD247;CD3D;CD3E;CD3G	4	1.30975e-07
7	GO:0031235	intrinsic component of the cytoplasmic side of the plasma membrane	cellular component	ENSSSCG00000024211;NF1;RASA2;RASAL3	4	8.13639e-06
8	GO:0001772	immunological synapse	cellular component	CD3E;CD53;PRKCQ;RHOH	4	0.000161461
9	GO:0005911	cell-cell junction	cellular component	CD2;CD3E;CD53;LCP2	4	0.0400525
10	GO:0042101	T cell receptor complex	cellular component	CD247;CD3D;CD3E	3	0.000166053
11	GO:0008305	integrin complex	cellular component	ENSSSCG00000011245;ITGAE;ITGB7	3	0.00306679
12	GO:0001726	ruffle	cellular component	ENSSSCG00000025567;LCP1;TESC	3	0.00934599
13	GO:0002102	podosome	cellular component	LCP1;LPXN	2	0.00997928
14	GO:0016235	aggresome	cellular component	FGR;PRKCQ	2	0.026862
15	GO:0030175	filopodium	cellular component	ENSSSCG00000025567;LCP1	2	0.0468136
16	GO:0005884	actin filament	cellular component	LCP1;WIPF1	2	0.0468136
17	GO:0033193	Lsd1/2 complex	cellular component	TAL1	1	0.0128658
18	GO:0042571	immunoglobulin complex, circulating	cellular component	TRDC	1	0.0128658
19	GO:0045275	respiratory chain complex III	cellular component	CYTB	1	0.0128658
20	GO:0070557	PCNA-p21 complex	cellular component	PCNA	1	0.0128658
21	GO:0043626	PCNA complex	cellular component	PCNA	1	0.0128658
22	GO:0098562	cytoplasmic side of membrane	cellular component	RASAL3	1	0.0128658
23	GO:0036398	TCR signalosome	cellular component	LCP2	1	0.0255671
24	GO:0034669	integrin alpha4-beta7 complex	cellular component	ITGB7	1	0.0255671
25	GO:1902560	GMP reductase complex	cellular component	GMPR	1	0.0255671
26	GO:0001740	Barr body	cellular component	H3F3A	1	0.0381059
27	GO:0005085	guanyl-nucleotide exchange factor activity	molecular function	ARHGEF3;ENSSSCG00000004065;ENSSSCG00000006851;ENSSSCG00000016237;ENSSSCG00000017008;ENSSSCG00000022520;RASGEF1A;RASGRF1;RASGRP1	9	9.22674e-07
28	GO:0042803	protein homodimerization activity	molecular function	ARID3A;CCL5;CD2;CRYAB;HIP1;JAML;RASGRP1;SLC39A13;TESC	9	0.0328556
29	GO:0046982	protein heterodimerization activity	molecular function	CD3D;CD3E;CD3G;H3F3A;HIP1;MEF2C;MICU1;TAL1	8	0.00409794
30	GO:0005525	GTP binding	molecular function	ENSSSCG00000027496;GTPBP8;IFT27;MX1;RAB33A;RHOH;SEPT1;SEPT5	8	0.0213637
31	GO:0003779	actin binding	molecular function	CAP1;CFL2;ENSSSCG00000025567;ENSSSCG00000027584;HIP1;LCP1;WIPF1	7	0.00705681
32	GO:0005102	receptor binding	molecular function	CD2;ENSSSCG00000027885;F2;FGR;FYB;SEMA4D;TAC4	7	0.0117991
33	GO:0051015	actin filament binding	molecular function	CFL2;ENSSSCG00000022766;ENSSSCG00000025567;HIP1;LCP1	5	0.00634996
34	GO:0004888	transmembrane signaling receptor activity	molecular function	CD247;CD3D;CD3E;CD3G;SEMA4D	5	0.00793054
35	GO:0000287	magnesium ion binding	molecular function	ENSSSCG00000008773;GTPBP8;ICK;PPM1A;TESC	5	0.0200032
36	GO:0000981	RNA polymerase II transcription factor activity, sequence-specific DNA binding	molecular function	ENSSSCG00000022632;ENSSSCG00000024457;ETS1;MEF2C;TAL1	5	0.0262978
37	GO:0005096	GTPase activator activity	molecular function	ENSSSCG00000024211;NF1;RASA2;RASAL3;SRGAP1	5	0.0455121
38	GO:0005089	Rho guanyl-nucleotide exchange factor activity	molecular function	ARHGEF3;ENSSSCG00000004065;ENSSSCG00000006851;RASGRF1	4	0.00874054
39	GO:0004252	serine-type endopeptidase activity	molecular function	ENSSSCG00000023520;ENSSSCG00000024003;F2;LTF	4	0.0465165
40	GO:0017124	SH3 domain binding	molecular function	AFAP1L2;CD3E;WIPF1	3	0.00658304
41	GO:0050839	cell adhesion molecule binding	molecular function	ITGB7;JAML;SELL	3	0.0126924
42	GO:0034987	immunoglobulin receptor binding	molecular function	FGR;TRDC	2	0.000970783
43	GO:0033613	activating transcription factor binding	molecular function	ATOH8;MEF2C	2	0.00331231
44	GO:0005088	Ras guanyl-nucleotide exchange factor activity	molecular function	RASGEF1A;RASGRP1	2	0.00437916
45	GO:0031210	phosphatidylcholine binding	molecular function	NF1;RASGRP1	2	0.0116947
46	GO:0070888	E-box binding	molecular function	ATOH8;TAL1	2	0.0135295
47	GO:0043236	laminin binding	molecular function	THBS1;TINAGL1	2	0.0154802
48	GO:0048365	Rac GTPase binding	molecular function	ARHGDIB;SRGAP1	2	0.0175437
49	GO:0001786	phosphatidylserine binding	molecular function	RASGRP1;THBS1	2	0.0243789
50	GO:0044183	protein binding involved in protein folding	molecular function	ENSSSCG00000028568;HSPB1	2	0.0294425
51	GO:0031729	CCR4 chemokine receptor binding	molecular function	CCL5	1	0.0128658
52	GO:0034988	Fc-gamma receptor I complex binding	molecular function	FGR	1	0.0128658
53	GO:0017174	glycine N-methyltransferase activity	molecular function	GNMT	1	0.0128658
54	GO:0031726	CCR1 chemokine receptor binding	molecular function	CCL5	1	0.0128658
55	GO:0097363	protein O-GlcNAc transferase activity	molecular function	OGT	1	0.0128658
56	GO:0046817	chemokine receptor antagonist activity	molecular function	CCL5	1	0.0128658
57	GO:0005094	Rho GDP-dissociation inhibitor activity	molecular function	ARHGDIB	1	0.0128658
58	GO:0000701	purine-specific mismatch base pair DNA N-glycosylase activity	molecular function	PCNA	1	0.0128658
59	GO:0030298	receptor signaling protein tyrosine kinase activator activity	molecular function	CCL5	1	0.0128658
60	GO:0031730	CCR5 chemokine receptor binding	molecular function	CCL5	1	0.0128658
61	GO:0052856	NADHX epimerase activity	molecular function	APOA1BP	1	0.0128658
62	GO:0003680	AT DNA binding	molecular function	MEF2C	1	0.0255671
63	GO:1990050	phosphatidic acid transporter activity	molecular function	TRIAP1	1	0.0255671
64	GO:0032405	MutLalpha complex binding	molecular function	PCNA	1	0.0255671
65	GO:0004053	arginase activity	molecular function	ARG2	1	0.0255671
66	GO:0070051	fibrinogen binding	molecular function	THBS1	1	0.0255671
67	GO:0016262	protein N-acetylglucosaminyltransferase activity	molecular function	OGT	1	0.0255671
68	GO:0030337	DNA polymerase processivity factor activity	molecular function	PCNA	1	0.0255671
69	GO:0035254	glutamate receptor binding	molecular function	RASGRF1	1	0.0255671
70	GO:0070052	collagen V binding	molecular function	THBS1	1	0.0255671
71	GO:0032139	dinucleotide insertion or deletion binding	molecular function	PCNA	1	0.0255671
72	GO:0030171	voltage-gated proton channel activity	molecular function	HVCN1	1	0.0255671
73	GO:0003920	GMP reductase activity	molecular function	GMPR	1	0.0255671
74	GO:0019212	phosphatase inhibitor activity	molecular function	TESC	1	0.0381059
75	GO:0019210	kinase inhibitor activity	molecular function	RHOH	1	0.0381059
76	GO:0050786	RAGE receptor binding	molecular function	S100A12	1	0.0381059
77	GO:0070053	thrombospondin receptor activity	molecular function	F2	1	0.0381059
78	GO:0004605	phosphatidate cytidylyltransferase activity	molecular function	CDS1	1	0.0381059
79	GO:0004045	aminoacyl-tRNA hydrolase activity	molecular function	PTRH2	1	0.0381059
80	GO:0033192	calmodulin-dependent protein phosphatase activity	molecular function	PPM1A	1	0.0381059
81	GO:0043547	positive regulation of GTPase activity	biological process	ARHGEF3;ENSSSCG00000004065;ENSSSCG00000006851;ENSSSCG00000016237;ENSSSCG00000017008;ENSSSCG00000022520;ENSSSCG00000024211;NF1;RASA2;RASAL3;RASGEF1A;RASGRF1;RASGRP1;SEMA4D;SRGAP1;XCL1	16	1.48191e-06
82	GO:0007264	small GTPase mediated signal transduction	biological process	ENSSSCG00000016237;ENSSSCG00000017008;ENSSSCG00000022520;ENSSSCG00000027496;IFT27;RAB33A;RASGEF1A;RASGRF1;RASGRP1;RHOH	10	0.000152227
83	GO:0006955	immune response	biological process	CCL5;CH242-363D24.1;ENSSSCG00000024003;FYB;IL10;LCP2;SLA-DRB1;THBS1;TINAGL1;XCL1	10	0.000319997
84	GO:0035556	intracellular signal transduction	biological process	ARHGEF3;ENSSSCG00000004065;ENSSSCG00000006851;ENSSSCG00000025037;ICK;LCP2;PRKCQ;RASA2;RASGRF1;RASGRP1	10	0.00402023
85	GO:0045893	positive regulation of transcription, DNA-templated	biological process	AFAP1L2;ATOH8;ETS1;IL10;KLHL6;MEF2C;PPM1A;TAL1;TESC	9	0.011998
86	GO:0006954	inflammatory response	biological process	AFAP1L2;CCL5;CD180;CH242-363D24.1;IL10;S100A12;THBS1;XCL1	8	0.000543953
87	GO:0016477	cell migration	biological process	ENSSSCG00000025567;ENSSSCG00000027885;FGR;LCP1;PSTPIP1;RASGEF1A;THBS1	7	0.000634931
88	GO:0007155	cell adhesion	biological process	CD2;ENSSSCG00000011245;ITGAE;ITGB7;SELL;THBS1;TINAGL1	7	0.0281122
89	GO:0007166	cell surface receptor signaling pathway	biological process	CD247;CD3D;CD3E;CD3G;CD53;F2	6	0.00337669
90	GO:0030154	cell differentiation	biological process	ATOH8;ENSSSCG00000022632;ENSSSCG00000024457;ENSSSCG00000027885;ETS1;FGR	6	0.0133816
91	GO:0035023	regulation of Rho protein signal transduction	biological process	ARHGDIB;ARHGEF3;ENSSSCG00000004065;ENSSSCG00000006851;RASGRF1	5	0.00192312
92	GO:0030036	actin cytoskeleton organization	biological process	CAP1;ENSSSCG00000017008;ENSSSCG00000022520;ENSSSCG00000025567;NF1	5	0.00294185
93	GO:0045087	innate immune response	biological process	ENSSSCG00000027885;FGR;MX1;S100A12;TRDC	5	0.0187536
94	GO:0042127	regulation of cell proliferation	biological process	CH242-363D24.1;ENSSSCG00000027885;FGR;NF1;TAL1	5	0.0374226
95	GO:0046580	negative regulation of Ras protein signal transduction	biological process	ENSSSCG00000024211;NF1;RASA2;RASAL3	4	5.52399e-05
96	GO:0030217	T cell differentiation	biological process	CD3D;ENSSSCG00000020890;ENSSSCG00000027914;RHOH	4	0.000229882
97	GO:0014068	positive regulation of phosphatidylinositol 3-kinase signaling	biological process	CCL5;F2;FGR;SEMA4D	4	0.00113012
98	GO:0007229	integrin-mediated signaling pathway	biological process	ENSSSCG00000011245;FGR;ITGAE;ITGB7	4	0.00240481
99	GO:0009615	response to virus	biological process	CCL5;DHX58;MEF2C;MX1	4	0.00283385
100	GO:0043087	regulation of GTPase activity	biological process	NF1;RASA2;RASAL3;RASGRP1	4	0.00615042
101	GO:0007169	transmembrane receptor protein tyrosine kinase signaling pathway	biological process	ENSSSCG00000027885;EPHB6;FGR;LCP2	4	0.018836
102	GO:0030335	positive regulation of cell migration	biological process	CCL5;FGR;SEMA4D;THBS1	4	0.0267698
103	GO:0035025	positive regulation of Rho protein signal transduction	biological process	ENSSSCG00000020890;ENSSSCG00000027914;P2RY10	3	0.000849719
104	GO:0050853	B cell receptor signaling pathway	biological process	KLHL6;MEF2C;TRDC	3	0.00103596
105	GO:0051482	positive regulation of cytosolic calcium ion concentration involved in phospholipase C-activating G-protein coupled signaling pathway	biological process	ENSSSCG00000020890;ENSSSCG00000027914;P2RY10	3	0.00103596
106	GO:0001937	negative regulation of endothelial cell proliferation	biological process	ATOH8;NF1;THBS1	3	0.00174248
107	GO:0061098	positive regulation of protein tyrosine kinase activity	biological process	AFAP1L2;CCL5;ENSSSCG00000026352	3	0.00174248
108	GO:0045071	negative regulation of viral genome replication	biological process	CCL5;LTF;MX1	3	0.00203073
109	GO:0050900	leukocyte migration	biological process	ITGB7;JAML;SELL	3	0.00269202
110	GO:0007519	skeletal muscle tissue development	biological process	CFL2;MEF2C;NF1	3	0.00269202
111	GO:0050852	T cell receptor signaling pathway	biological process	CD247;CD3E;LCP2	3	0.00306679
112	GO:0010595	positive regulation of endothelial cell migration	biological process	ATOH8;ETS1;THBS1	3	0.00437705
113	GO:0043124	negative regulation of I-kappaB kinase/NF-kappaB signaling	biological process	NLRC3;PPM1A;RHOH	3	0.00487813
114	GO:0051017	actin filament bundle assembly	biological process	ENSSSCG00000022766;ENSSSCG00000025567;LCP1	3	0.00658304
115	GO:0042102	positive regulation of T cell proliferation	biological process	CCL5;CD3E;PRKCQ	3	0.0101271
116	GO:0001938	positive regulation of endothelial cell proliferation	biological process	IL10;NF1;PPP1R16B	3	0.0101271
117	GO:0097190	apoptotic signaling pathway	biological process	CD3E;CH242-363D24.1;HIP1	3	0.0155964
118	GO:0001649	osteoblast differentiation	biological process	H3F3A;MEF2C;NF1	3	0.0250259
119	GO:0000165	MAPK cascade	biological process	CCL5;MEF2C;NF1	3	0.0277685
120	GO:0071222	cellular response to lipopolysaccharide	biological process	CD180;IL10;MEF2C	3	0.0306647
121	GO:0030182	neuron differentiation	biological process	ENSSSCG00000026352;MEF2C;TAL1	3	0.035295
122	GO:0006898	receptor-mediated endocytosis	biological process	CAP1;ENSSSCG00000006455;TINAGL1	3	0.0402649
123	GO:0050663	cytokine secretion	biological process	EPHB6;LCP2	2	0.000164574
124	GO:0035020	regulation of Rac protein signal transduction	biological process	OGT;RASGRF1	2	0.000489537
125	GO:0030219	megakaryocyte differentiation	biological process	TAL1;TESC	2	0.000489537
126	GO:0014066	regulation of phosphatidylinositol 3-kinase signaling	biological process	PPP1R16B;RASGRP1	2	0.000970783
127	GO:0045086	positive regulation of interleukin-2 biosynthetic process	biological process	CD3E;PRKCQ	2	0.000970783
128	GO:1900246	positive regulation of RIG-I signaling pathway	biological process	DHX58;PUM2	2	0.000970783
129	GO:0045576	mast cell activation	biological process	LCP2;RHOH	2	0.00160428
130	GO:0002467	germinal center formation	biological process	KLHL6;MEF2C	2	0.00160428
131	GO:1902715	positive regulation of interferon-gamma secretion	biological process	CD2;RASGRP1	2	0.00160428
132	GO:2000310	regulation of NMDA receptor activity	biological process	MEF2C;RASGRF1	2	0.00238608
133	GO:0070233	negative regulation of T cell apoptotic process	biological process	CCL5;PRKCQ	2	0.00238608
134	GO:0032695	negative regulation of interleukin-12 production	biological process	IL10;THBS1	2	0.00238608
135	GO:0048712	negative regulation of astrocyte differentiation	biological process	F2;NF1	2	0.00331231
136	GO:0045088	regulation of innate immune response	biological process	DHX58;FGR	2	0.00331231
137	GO:0001953	negative regulation of cell-matrix adhesion	biological process	NF1;THBS1	2	0.00437916
138	GO:0033628	regulation of cell adhesion mediated by integrin	biological process	LPXN;TESC	2	0.00437916
139	GO:0045742	positive regulation of epidermal growth factor receptor signaling pathway	biological process	AFAP1L2;HIP1	2	0.0055829
140	GO:0030194	positive regulation of blood coagulation	biological process	F2;THBS1	2	0.0055829
141	GO:0046579	positive regulation of Ras protein signal transduction	biological process	RASGEF1A;RASGRP1	2	0.00691988
142	GO:0050870	positive regulation of T cell activation	biological process	CD3E;PRKCQ	2	0.00691988
143	GO:2000379	positive regulation of reactive oxygen species metabolic process	biological process	F2;THBS1	2	0.00691988
144	GO:0035855	megakaryocyte development	biological process	PIP4K2A;TAL1	2	0.00691988
145	GO:1902043	positive regulation of extrinsic apoptotic signaling pathway via death domain receptors	biological process	NF1;THBS1	2	0.00691988
146	GO:0034113	heterotypic cell-cell adhesion	biological process	CD2;ITGB7	2	0.00838652
147	GO:0030220	platelet formation	biological process	MEF2C;TAL1	2	0.00838652
148	GO:0042073	intraciliary transport	biological process	ICK;IFT27	2	0.0116947
149	GO:0050715	positive regulation of cytokine secretion	biological process	FGR;IL10	2	0.0116947
150	GO:0048661	positive regulation of smooth muscle cell proliferation	biological process	CCL5;THBS1	2	0.0135295
151	GO:0042327	positive regulation of phosphorylation	biological process	CCL5;THBS1	2	0.0135295
152	GO:0045648	positive regulation of erythrocyte differentiation	biological process	ETS1;TAL1	2	0.0135295
153	GO:0007163	establishment or maintenance of cell polarity	biological process	CD3G;ENSSSCG00000025567	2	0.0154802
154	GO:0032689	negative regulation of interferon-gamma production	biological process	IL10;PGLYRP2	2	0.0154802
155	GO:0032753	positive regulation of interleukin-4 production	biological process	CD3E;PRKCQ	2	0.0154802
156	GO:0042110	T cell activation	biological process	HSH2D;NLRC3	2	0.0197167
157	GO:0045765	regulation of angiogenesis	biological process	ETS1;NF1	2	0.0219961
158	GO:0032715	negative regulation of interleukin-6 production	biological process	IL10;NLRC3	2	0.026862
159	GO:0071560	cellular response to transforming growth factor beta stimulus	biological process	MEF2C;PPM1A	2	0.026862
160	GO:0007162	negative regulation of cell adhesion	biological process	LPXN;SEMA4D	2	0.026862
161	GO:0034644	cellular response to UV	biological process	PCNA;TRIAP1	2	0.0321176
162	GO:0032720	negative regulation of tumor necrosis factor production	biological process	IL10;NLRC3	2	0.0321176
163	GO:0007265	Ras protein signal transduction	biological process	NF1;RASGRP1	2	0.0348843
164	GO:0032760	positive regulation of tumor necrosis factor production	biological process	CD2;RASGRP1	2	0.03774
165	GO:0050830	defense response to Gram-positive bacterium	biological process	FGR;PGLYRP2	2	0.0468136
166	GO:0002605	negative regulation of dendritic cell antigen processing and presentation	biological process	THBS1	1	0.0128658
167	GO:0032077	positive regulation of deoxyribonuclease activity	biological process	PCNA	1	0.0128658
168	GO:1903034	regulation of response to wounding	biological process	IL10	1	0.0128658
169	GO:0007056	spindle assembly involved in female meiosis	biological process	SEPT1	1	0.0128658
170	GO:0046878	positive regulation of saliva secretion	biological process	TAC4	1	0.0128658
171	GO:2000987	positive regulation of behavioral fear response	biological process	MEF2C	1	0.0128658
172	GO:0072160	nephron tubule epithelial cell differentiation	biological process	MEF2C	1	0.0128658
173	GO:0044793	negative regulation by host of viral process	biological process	LTF	1	0.0128658
174	GO:0060297	regulation of sarcomere organization	biological process	MEF2C	1	0.0128658
175	GO:0060302	negative regulation of cytokine activity	biological process	IL10	1	0.0128658
176	GO:0001704	formation of primary germ layer	biological process	ATOH8	1	0.0128658
177	GO:0060217	hemangioblast cell differentiation	biological process	TAL1	1	0.0128658
178	GO:0019732	antifungal humoral response	biological process	LTF	1	0.0128658
179	GO:0003138	primary heart field specification	biological process	MEF2C	1	0.0128658
180	GO:0060025	regulation of synaptic activity	biological process	MEF2C	1	0.0128658
181	GO:0001806	type IV hypersensitivity	biological process	EPHB6	1	0.0128658
182	GO:0070486	leukocyte aggregation	biological process	SEMA4D	1	0.0128658
183	GO:0045685	regulation of glial cell differentiation	biological process	NF1	1	0.0128658
184	GO:0061534	gamma-aminobutyric acid secretion, neurotransmission	biological process	NF1	1	0.0128658
185	GO:0042531	positive regulation of tyrosine phosphorylation of STAT protein	biological process	CCL5	1	0.0128658
186	GO:0002581	negative regulation of antigen processing and presentation of peptide or polysaccharide antigen via MHC class II	biological process	THBS1	1	0.0128658
187	GO:0046629	gamma-delta T cell activation	biological process	JAML	1	0.0128658
188	GO:0090218	positive regulation of lipid kinase activity	biological process	F2	1	0.0128658
189	GO:1900738	positive regulation of phospholipase C-activating G-protein coupled receptor signaling pathway	biological process	F2	1	0.0128658
190	GO:1900229	negative regulation of single-species biofilm formation in or on host organism	biological process	LTF	1	0.0128658
191	GO:0035696	monocyte extravasation	biological process	JAML	1	0.0128658
192	GO:0031328	positive regulation of cellular biosynthetic process	biological process	CCL5	1	0.0128658
193	GO:1900220	semaphorin-plexin signaling pathway involved in bone trabecula morphogenesis	biological process	SEMA4D	1	0.0128658
194	GO:0002875	negative regulation of chronic inflammatory response to antigenic stimulus	biological process	IL10	1	0.0128658
195	GO:2000318	positive regulation of T-helper 17 type immune response	biological process	PRKCQ	1	0.0128658
196	GO:0045799	positive regulation of chromatin assembly or disassembly	biological process	TAL1	1	0.0128658
197	GO:0060375	regulation of mast cell differentiation	biological process	TAL1	1	0.0128658
198	GO:0072672	neutrophil extravasation	biological process	JAML	1	0.0128658
199	GO:0010754	negative regulation of cGMP-mediated signaling	biological process	THBS1	1	0.0128658
200	GO:0070228	regulation of lymphocyte apoptotic process	biological process	CD3G	1	0.0128658
201	GO:0061535	glutamate secretion, neurotransmission	biological process	NF1	1	0.0128658
202	GO:0003185	sinoatrial valve morphogenesis	biological process	MEF2C	1	0.0128658
203	GO:1903589	positive regulation of blood vessel endothelial cell proliferation involved in sprouting angiogenesis	biological process	PPP1R16B	1	0.0128658
204	GO:0045652	regulation of megakaryocyte differentiation	biological process	MEF2C	1	0.0128658
205	GO:0098597	observational learning	biological process	NF1	1	0.0128658
206	GO:2000570	positive regulation of T-helper 2 cell activation	biological process	PRKCQ	1	0.0128658
207	GO:0019428	allantoin biosynthetic process	biological process	URAD	1	0.0128658
208	GO:0046929	negative regulation of neurotransmitter secretion	biological process	NF1	1	0.0128658
209	GO:1901253	negative regulation of intracellular transport of viral material	biological process	MX1	1	0.0255671
210	GO:0030043	actin filament fragmentation	biological process	CFL2	1	0.0255671
211	GO:0010757	negative regulation of plasminogen activation	biological process	THBS1	1	0.0255671
212	GO:0090526	regulation of gluconeogenesis involved in cellular glucose homeostasis	biological process	OGT	1	0.0255671
213	GO:0002904	positive regulation of B cell apoptotic process	biological process	IL10	1	0.0255671
214	GO:0031509	telomeric heterochromatin assembly	biological process	H3F3A	1	0.0255671
215	GO:0061614	pri-miRNA transcription from RNA polymerase II promoter	biological process	ETS1	1	0.0255671
216	GO:0097035	regulation of membrane lipid distribution	biological process	TRIAP1	1	0.0255671
217	GO:1902340	negative regulation of chromosome condensation	biological process	H3F3A	1	0.0255671
218	GO:0032387	negative regulation of intracellular transport	biological process	CRYAB	1	0.0255671
219	GO:0072678	T cell migration	biological process	ITGB7	1	0.0255671
220	GO:1902309	negative regulation of peptidyl-serine dephosphorylation	biological process	PPP1R16B	1	0.0255671
221	GO:0002544	chronic inflammatory response	biological process	THBS1	1	0.0255671
222	GO:2001027	negative regulation of endothelial cell chemotaxis	biological process	THBS1	1	0.0255671
223	GO:0048525	negative regulation of viral process	biological process	LTF	1	0.0255671
224	GO:0002669	positive regulation of T cell anergy	biological process	CD3E	1	0.0255671
225	GO:0009268	response to pH	biological process	HVCN1	1	0.0255671
226	GO:2000111	positive regulation of macrophage apoptotic process	biological process	MEF2C	1	0.0255671
227	GO:0034112	positive regulation of homotypic cell-cell adhesion	biological process	CCL5	1	0.0255671
228	GO:0039534	negative regulation of MDA-5 signaling pathway	biological process	DHX58	1	0.0255671
229	GO:1900245	positive regulation of MDA-5 signaling pathway	biological process	DHX58	1	0.0255671
230	GO:0003366	cell-matrix adhesion involved in ameboidal cell migration	biological process	ITGB7	1	0.0255671
231	GO:0030221	basophil differentiation	biological process	TAL1	1	0.0255671
232	GO:0051311	meiotic metaphase plate congression	biological process	SEPT1	1	0.0255671
233	GO:0010694	positive regulation of alkaline phosphatase activity	biological process	MEF2C	1	0.0255671
234	GO:0035720	intraciliary anterograde transport	biological process	ICK	1	0.0255671
235	GO:0031344	regulation of cell projection organization	biological process	SEMA4D	1	0.0255671
236	GO:0032252	secretory granule localization	biological process	RASGRP1	1	0.0255671
237	GO:2001016	positive regulation of skeletal muscle cell differentiation	biological process	MEF2C	1	0.0255671
238	GO:0010748	negative regulation of plasma membrane long-chain fatty acid transport	biological process	THBS1	1	0.0255671
239	GO:2000588	positive regulation of platelet-derived growth factor receptor-beta signaling pathway	biological process	HIP1	1	0.0255671
240	GO:0006525	arginine metabolic process	biological process	ARG2	1	0.0255671
241	GO:0072102	glomerulus morphogenesis	biological process	MEF2C	1	0.0255671
242	GO:0021897	forebrain astrocyte development	biological process	NF1	1	0.0255671
243	GO:0035021	negative regulation of Rac protein signal transduction	biological process	NF1	1	0.0255671
244	GO:0030886	negative regulation of myeloid dendritic cell activation	biological process	IL10	1	0.0255671
245	GO:0034115	negative regulation of heterotypic cell-cell adhesion	biological process	IL10	1	0.0255671
246	GO:1902732	positive regulation of chondrocyte proliferation	biological process	LTF	1	0.0255671
247	GO:0010751	negative regulation of nitric oxide mediated signal transduction	biological process	THBS1	1	0.0255671
248	GO:0032026	response to magnesium ion	biological process	THBS1	1	0.0255671
249	GO:0061087	positive regulation of histone H3-K27 methylation	biological process	OGT	1	0.0255671
250	GO:0031665	negative regulation of lipopolysaccharide-mediated signaling pathway	biological process	LTF	1	0.0255671
251	GO:0051902	negative regulation of mitochondrial depolarization	biological process	HSH2D	1	0.0255671
252	GO:2000525	positive regulation of T cell costimulation	biological process	EPHB6	1	0.0255671
253	GO:0002903	negative regulation of B cell apoptotic process	biological process	HSH2D	1	0.0255671
254	GO:0032675	regulation of interleukin-6 production	biological process	AFAP1L2	1	0.0255671
255	GO:0090230	regulation of centromere complex assembly	biological process	H3F3A	1	0.0255671
256	GO:0009303	rRNA transcription	biological process	RNASEK	1	0.0255671
257	GO:0044314	protein K27-linked ubiquitination	biological process	UBE2D4	1	0.0255671
258	GO:0042992	negative regulation of transcription factor import into nucleus	biological process	NF1	1	0.0255671
259	GO:0090330	regulation of platelet aggregation	biological process	PRKCQ	1	0.0255671
260	GO:0007521	muscle cell fate determination	biological process	MEF2C	1	0.0255671
261	GO:0035984	cellular response to trichostatin A	biological process	MEF2C	1	0.0255671
262	GO:0032417	positive regulation of sodium:proton antiporter activity	biological process	TESC	1	0.0255671
263	GO:2001013	epithelial cell proliferation involved in renal tubule morphogenesis	biological process	MEF2C	1	0.0255671
264	GO:0035519	protein K29-linked ubiquitination	biological process	UBE2D4	1	0.0255671
265	GO:2000110	negative regulation of macrophage apoptotic process	biological process	CCL5	1	0.0255671
266	GO:0045762	positive regulation of adenylate cyclase activity	biological process	NF1	1	0.0255671
267	GO:0046649	lymphocyte activation	biological process	CD3E	1	0.0255671
268	GO:0032680	regulation of tumor necrosis factor production	biological process	LTF	1	0.0381059
269	GO:0006499	N-terminal protein myristoylation	biological process	PPM1A	1	0.0381059
270	GO:0006655	phosphatidylglycerol biosynthetic process	biological process	CDS1	1	0.0381059
271	GO:0070100	negative regulation of chemokine-mediated signaling pathway	biological process	CCL5	1	0.0381059
272	GO:0002634	regulation of germinal center formation	biological process	MEF2C	1	0.0381059
273	GO:0044117	growth of symbiont in host	biological process	PGLYRP2	1	0.0381059
274	GO:0002322	B cell proliferation involved in immune response	biological process	CD180	1	0.0381059
275	GO:0051142	positive regulation of NK T cell proliferation	biological process	RASAL3	1	0.0381059
276	GO:0030854	positive regulation of granulocyte differentiation	biological process	TESC	1	0.0381059
277	GO:0030578	PML body organization	biological process	ETS1	1	0.0381059
278	GO:0045637	regulation of myeloid cell differentiation	biological process	TAL1	1	0.0381059
279	GO:0032816	positive regulation of natural killer cell activation	biological process	RASGRP1	1	0.0381059
280	GO:0045124	regulation of bone resorption	biological process	NF1	1	0.0381059
281	GO:1900271	regulation of long-term synaptic potentiation	biological process	NF1	1	0.0381059
282	GO:0003211	cardiac ventricle formation	biological process	MEF2C	1	0.0381059
283	GO:0071357	cellular response to type I interferon	biological process	MX1	1	0.0381059
284	GO:0055012	ventricular cardiac muscle cell differentiation	biological process	MEF2C	1	0.0381059
285	GO:0007406	negative regulation of neuroblast proliferation	biological process	NF1	1	0.0381059
286	GO:0010693	negative regulation of alkaline phosphatase activity	biological process	SEMA4D	1	0.0381059
287	GO:0071864	positive regulation of cell proliferation in bone marrow	biological process	MEF2C	1	0.0381059
288	GO:0006163	purine nucleotide metabolic process	biological process	GMPR	1	0.0381059
289	GO:0032827	negative regulation of natural killer cell differentiation involved in immune response	biological process	PGLYRP2	1	0.0381059
290	GO:0043652	engulfment of apoptotic cell	biological process	THBS1	1	0.0381059
291	GO:0046500	S-adenosylmethionine metabolic process	biological process	GNMT	1	0.0381059
292	GO:0032800	receptor biosynthetic process	biological process	IL10	1	0.0381059
293	GO:0006555	methionine metabolic process	biological process	GNMT	1	0.0381059
294	GO:0046641	positive regulation of alpha-beta T cell proliferation	biological process	CD3E	1	0.0381059
295	GO:0031508	pericentric heterochromatin assembly	biological process	H3F3A	1	0.0381059
296	GO:0032825	positive regulation of natural killer cell differentiation	biological process	RASGRP1	1	0.0381059
297	GO:0006110	regulation of glycolytic process	biological process	OGT	1	0.0381059
298	GO:1901164	negative regulation of trophoblast cell migration	biological process	ARHGDIB	1	0.0381059
299	GO:2000503	positive regulation of natural killer cell chemotaxis	biological process	CCL5	1	0.0381059
300	GO:0061333	renal tubule morphogenesis	biological process	MEF2C	1	0.0381059
301	GO:2001140	positive regulation of phospholipid transport	biological process	TRIAP1	1	0.0381059
302	GO:0006958	complement activation, classical pathway	biological process	TRDC	1	0.0381059
303	GO:0051450	myoblast proliferation	biological process	ATOH8	1	0.0381059
304	GO:0030325	adrenal gland development	biological process	NF1	1	0.0381059
305	GO:0061448	connective tissue development	biological process	SLC39A13	1	0.0381059
306	GO:0060018	astrocyte fate commitment	biological process	TAL1	1	0.0381059
307	GO:0060536	cartilage morphogenesis	biological process	MEF2C	1	0.0381059
308	GO:0060998	regulation of dendritic spine development	biological process	MEF2C	1	0.0381059
309	GO:0051918	negative regulation of fibrinolysis	biological process	THBS1	1	0.0381059
310	GO:0050871	positive regulation of B cell activation	biological process	TRDC	1	0.0381059
311	GO:0033157	regulation of intracellular protein transport	biological process	LCP1	1	0.0381059
