# Supplementary material for: Maternal dietary resveratrol alleviates weaning-associated diarrhea and intestinal inflammation in pig offspring by changing intestinal gene expression and microbiota
Source: Royal Society of Chemistry journal article supplement (doi:10.1039/c9fo00637k), 2019-01-01
Supplement: c9fo00637k4.xlsx [file c9fo00637k4.xlsx]

## Sheet: GO analysis
Supplementary Table 10: GO enrichment analysis of DEGs in post-weaning piglets.
Item	GO ID	GO Term	GO function	Genes	Gene number	P-value
1	GO:0009986	cell surface	cellular component	CCR7;CD44;CXCR3;CXCR4;EMP2;FCER1G	6	0.0279559
2	GO:0009897	external side of plasma membrane	cellular component	CCR7;CD48;CXCR3;FCER1G	4	0.0206074
3	GO:0000786	nucleosome	cellular component	ENSSSCG00000001177;H2AFZ;HIST1H1B	3	0.0039828
4	GO:0005770	late endosome	cellular component	CXCR4;RHOB;SLC30A4	3	0.0170971
5	GO:0005694	chromosome	cellular component	ENSSSCG00000001177;H2AFZ;HIST1H1B	3	0.0273708
6	GO:0016323	basolateral plasma membrane	cellular component	CD44;FLOT2;S100G	3	0.0293408
7	GO:0045121	membrane raft	cellular component	ARID3A;EMP2;FLOT2	3	0.0356887
8	GO:0072546	ER membrane protein complex	cellular component	EMC6;EMC9	2	0.00338593
9	GO:0005720	nuclear heterochromatin	cellular component	H2AFZ;HIST1H1B	2	0.00668945
10	GO:0017053	transcriptional repressor complex	cellular component	ENSSSCG00000030423;RCOR1	2	0.0309828
11	GO:0034365	discoidal high-density lipoprotein particle	cellular component	APOM	1	0.0089171
12	GO:0035692	macrophage migration inhibitory factor receptor complex	cellular component	CD44	1	0.0089171
13	GO:0009330	DNA topoisomerase complex (ATP-hydrolyzing	cellular component	TOP2A	1	0.0089171
14	GO:0097631	integral component of omegasome membrane	cellular component	EMC6	1	0.0089171
15	GO:0032998	Fc-epsilon receptor I complex	cellular component	FCER1G	1	0.0177554
16	GO:0002193	MAML1-RBP-Jkappa- ICN1 complex	cellular component	MAML1	1	0.0177554
17	GO:0043293	apoptosome	cellular component	ENSSSCG00000000884	1	0.0265155
18	GO:0090543	Flemming body	cellular component	CHMP4C	1	0.0265155
19	GO:0009331	glycerol-3-phosphate dehydrogenase complex	cellular component	ENSSSCG00000000214	1	0.0265155
20	GO:0001652	granular component	cellular component	CLEC3B	1	0.0351981
21	GO:0097440	apical dendrite	cellular component	OSBP2	1	0.0351981
22	GO:0016600	flotillin complex	cellular component	FLOT2	1	0.0438039
23	GO:0034366	spherical high-density lipoprotein particle	cellular component	APOM	1	0.0438039
24	GO:0034362	low-density lipoprotein particle	cellular component	APOM	1	0.0438039
25	GO:0016491	oxidoreductase activity	molecular function	CYBRD1;ENSSSCG00000000214;ENSSSCG00000013842;ENSSSCG00000028896;ND2;NOS2;OLFML3;RDH5	8	0.00844615
26	GO:0042803	protein homodimerization activity	molecular function	ARID3A;BHLHE40;CHMP4C;ENSSSCG00000000214;GJB1;GZMA;NOS2;TOP2A	8	0.0116563
27	GO:0046982	protein heterodimerization activity	molecular function	BHLHE40;CXCL13;ENSSSCG00000001177;FLOT2;H2AFZ;TOP2A	6	0.00899812
28	GO:0005215	transporter activity	molecular function	ENSSSCG00000004043;ENSSSCG00000023478;SLC46A1;SLC5A6	4	0.0498352
29	GO:0008201	heparin binding	molecular function	CLEC3B;CXCL13;PLA2G2D	3	0.019417
30	GO:0004950	chemokine receptor activity	molecular function	CCR7;CXCR3;CXCR4	3	0.000290834
31	GO:0031490	chromatin DNA binding	molecular function	H2AFZ;HIST1H1B	2	0.0309828
32	GO:0017049	GTP-Rho binding	molecular function	ENSSSCG00000008490;ENSSSCG00000021359	2	0.00411431
33	GO:0005031	tumor necrosis factor-activated receptor activity	molecular function	ENSSSCG00000003330;TNFRSF4	2	0.00871931
34	GO:0003918	DNA topoisomerase type II (ATP-hydrolyzing) activity	molecular function	TOP2A	1	0.0177554
35	GO:0003916	DNA topoisomerase activity	molecular function	TOP2A	1	0.0265155
36	GO:0038036	sphingosine-1-phosphate receptor activity	molecular function	S1PR2	1	0.0265155
37	GO:0004886	9-cis retinoic acid receptor activity	molecular function	RXRG	1	0.0089171
38	GO:0008745	N-acetylmuramoyl-L-alanine amidase activity	molecular function	PGLYRP2	1	0.0351981
39	GO:0016019	peptidoglycan receptor activity	molecular function	PGLYRP2	1	0.0351981
40	GO:0019164	pyruvate synthase activity	molecular function	OLFML3	1	0.0089171
41	GO:0008073	ornithine decarboxylase inhibitor activity	molecular function	OAZ2	1	0.0265155
42	GO:0034617	tetrahydrobiopterin binding	molecular function	NOS2	1	0.0177554
43	GO:0004517	nitric-oxide synthase activity	molecular function	NOS2	1	0.0265155
44	GO:0034618	arginine binding	molecular function	NOS2	1	0.0351981
45	GO:0004920	interleukin-10 receptor activity	molecular function	IL10RA	1	0.0177554
46	GO:0008903	hydroxypyruvate isomerase activity	molecular function	HYI	1	0.0089171
47	GO:0008887	glycerate kinase activity	molecular function	GLYCTK	1	0.0089171
48	GO:0036374	glutathione hydrolase activity	molecular function	GGT5	1	0.0265155
49	GO:0008889	glycerophosphodiester phosphodiesterase activity	molecular function	GDPD2	1	0.0438039
50	GO:0019767	IgE receptor activity	molecular function	FCER1G	1	0.0177554
51	GO:0019864	IgG binding	molecular function	FCER1G	1	0.0265155
52	GO:0019863	IgE binding	molecular function	FCER1G	1	0.0351981
53	GO:0004800	thyroxine 5'-deiodinase activity	molecular function	ENSSSCG00000028896	1	0.0351981
54	GO:0008890	glycine C-acetyltransferase activity	molecular function	ENSSSCG00000020981	1	0.0177554
55	GO:0004367	glycerol-3-phosphate dehydrogenase [NAD+] activity	molecular function	ENSSSCG00000000214	1	0.0177554
56	GO:0000293	ferric-chelate reductase activity	molecular function	CYBRD1	1	0.0177554
57	GO:0032027	myosin light chain binding	molecular function	CXCR4	1	0.0265155
58	GO:0019956	chemokine binding	molecular function	CXCR3	1	0.0351981
59	GO:0016494	C-X-C chemokine receptor activity	molecular function	CXCR3	1	0.0438039
60	GO:0031724	CXCR5 chemokine receptor binding	molecular function	CXCL13	1	0.0089171
61	GO:0031735	CCR10 chemokine receptor binding	molecular function	CXCL13	1	0.0265155
62	GO:0048248	CXCR3 chemokine receptor binding	molecular function	CXCL13	1	0.0351981
63	GO:0016505	peptidase activator activity involved in apoptotic process	molecular function	CTSC	1	0.0177554
64	GO:0036143	kringle domain binding	molecular function	CLEC3B	1	0.0089171
65	GO:0035758	chemokine (C-C motif) ligand 21 binding	molecular function	CCR7	1	0.0089171
66	GO:0035757	chemokine (C-C motif) ligand 19 binding	molecular function	CCR7	1	0.0089171
67	GO:0038121	C-C motif chemokine 21 receptor activity	molecular function	CCR7	1	0.0089171
68	GO:0038117	C-C motif chemokine 19 receptor activity	molecular function	CCR7	1	0.0089171
69	GO:0031997	N-terminal myristoylation domain binding	molecular function	CALM1	1	0.0177554
70	GO:0072542	protein phosphatase activator activity	molecular function	CALM1	1	0.0351981
71	GO:0001191	transcriptional repressor activity, RNA polymerase II transcription factor binding	molecular function	BHLHE40	1	0.0265155
72	GO:0043426	MRF binding	molecular function	BHLHE40	1	0.0351981
73	GO:0055114	oxidation-reduction process	biological process	CYBRD1;ENSSSCG00000000214;ENSSSCG00000013842;ENSSSCG00000028896;ND2;NOS2;OLFML3;RDH5;SDR16C5	9	0.0354241
74	GO:0006954	inflammatory response	biological process	CCR7;CXCL13;CXCR3;ENSSSCG00000003330;GGT5;TNFRSF4	6	0.00188096
75	GO:0032496	response to lipopolysaccharide	biological process	CCR7;CXCL13;ENSSSCG00000003330;NOS2;TNFRSF4	5	0.000421681
76	GO:0006334	nucleosome assembly	biological process	ANP32B;ENSSSCG00000001177;HIST1H1B;NAP1L1	4	0.000388322
77	GO:0070098	chemokine-mediated signaling pathway	biological process	CCR7;CXCL13;CXCR3;CXCR4	4	0.000934051
78	GO:0006935	chemotaxis	biological process	CCR7;CXCL13;CXCR3;CXCR4	4	0.00252824
79	GO:0042981	regulation of apoptotic process	biological process	ENSSSCG00000000884;ENSSSCG00000001778;ENSSSCG00000003330;TNFRSF4	4	0.018385
80	GO:0006915	apoptotic process	biological process	CTSC;EI24;ENSSSCG00000000884;IRF1	4	0.0217779
81	GO:0042127	regulation of cell proliferation	biological process	CXCL13;ENSSSCG00000003330;NOS2;TNFRSF4	4	0.0398596
82	GO:0097190	apoptotic signaling pathway	biological process	ENSSSCG00000000884;ENSSSCG00000003330;TNFRSF4	3	0.00500012
83	GO:0042742	defense response to bacterium	biological process	CXCL13;FCER1G;NOS2	3	0.00575757
84	GO:0010951	negative regulation of endopeptidase activity	biological process	C4A;ENSSSCG00000021201;TIMP1	3	0.0210555
85	GO:0001765	membrane raft assembly	biological process	EMP2;FLOT2	2	0.000774732
86	GO:0016064	immunoglobulin mediated immune response	biological process	C4A;FCER1G	2	0.00115532
87	GO:0050868	negative regulation of T cell activation	biological process	PLA2G2D;TNFAIP8L2	2	0.00115532
88	GO:0001913	T cell mediated cytotoxicity	biological process	CTSC;EMP2	2	0.00115532
89	GO:0071345	cellular response to cytokine stimulus	biological process	CCR7;CXCR4	2	0.0027246
90	GO:0031274	positive regulation of pseudopodium assembly	biological process	ENSSSCG00000008490;ENSSSCG00000021359	2	0.0027246
91	GO:0050776	regulation of immune response	biological process	FCER1G;IRF1	2	0.00871931
92	GO:0007266	Rho protein signal transduction	biological process	ENSSSCG00000008490;ENSSSCG00000021359	2	0.0162111
93	GO:0030838	positive regulation of actin filament polymerization	biological process	ENSSSCG00000008490;ENSSSCG00000021359	2	0.0273645
94	GO:0033209	tumor necrosis factor-mediated signaling pathway	biological process	ENSSSCG00000003330;TNFRSF4	2	0.0309828
95	GO:0007623	circadian rhythm	biological process	BHLHE40;NOS2	2	0.032859
96	GO:0006869	lipid transport	biological process	APOM;OSBP2	2	0.0347788
97	GO:0051603	proteolysis involved in cellular protein catabolic process	biological process	CTSC;GZMA	2	0.0387452
98	GO:0072659	protein localization to plasma membrane	biological process	EMP2;FCER1G	2	0.04079
99	GO:0002244	hematopoietic progenitor cell differentiation	biological process	ACP6;TOP2A	2	0.0471607
100	GO:0002292	T cell differentiation involved in immune response	biological process	FCER1G	1	0.0089171
101	GO:0002554	serotonin secretion by platelet	biological process	FCER1G	1	0.0089171
102	GO:0060928	atrioventricular node cell development	biological process	MAML1	1	0.0089171
103	GO:0035769	B cell chemotaxis across high endothelial venule	biological process	CXCL13	1	0.0089171
104	GO:1900155	negative regulation of bone trabecula formation	biological process	CHAD	1	0.0089171
105	GO:0044860	protein localization to plasma membrane raft	biological process	FLOT2	1	0.0089171
106	GO:1901750	leukotriene D4 biosynthetic process	biological process	GGT5	1	0.0089171
107	GO:2000522	positive regulation of immunological synapse formation	biological process	CCR7	1	0.0089171
108	GO:0002885	positive regulation of hypersensitivity	biological process	CCR7	1	0.0089171
109	GO:0033026	negative regulation of mast cell apoptotic process	biological process	FCER1G	1	0.0089171
110	GO:0051354	negative regulation of oxidoreductase activity	biological process	GZMA	1	0.0089171
111	GO:0050706	regulation of interleukin-1 beta secretion	biological process	CCR7	1	0.0089171
112	GO:0038115	chemokine (C-C motif) ligand 19 signaling pathway	biological process	CCR7	1	0.0089171
113	GO:1901522	positive regulation of transcription from RNA polymerase II promoter involved in cellular response to chemical stimulus	biological process	RXRG	1	0.0089171
114	GO:0032310	prostaglandin secretion	biological process	NOS2	1	0.0089171
115	GO:0045870	positive regulation of single stranded viral RNA replication via double stranded DNA intermediate	biological process	TOP2A	1	0.0089171
116	GO:0002922	positive regulation of humoral immune response	biological process	CCR7	1	0.0089171
117	GO:0055069	zinc ion homeostasis	biological process	SLC30A4	1	0.0089171
118	GO:0032078	negative regulation of endodeoxyribonuclease activity	biological process	GZMA	1	0.0089171
119	GO:2000526	positive regulation of glycoprotein biosynthetic process involved in immunological synapse formation	biological process	CCR7	1	0.0089171
120	GO:0035768	endothelial cell chemotaxis to fibroblast growth factor	biological process	CXCL13	1	0.0089171
121	GO:0072610	interleukin-12 secretion	biological process	CCR7	1	0.0089171
122	GO:0002431	Fc receptor mediated stimulatory signaling pathway	biological process	FCER1G	1	0.0089171
123	GO:1902992	negative regulation of amyloid precursor protein catabolic process	biological process	FLOT2	1	0.0089171
124	GO:0032649	regulation of interferon-gamma production	biological process	CCR7	1	0.0089171
125	GO:0038116	chemokine (C-C motif) ligand 21 signaling pathway	biological process	CCR7	1	0.0089171
126	GO:0072604	interleukin-6 secretion	biological process	NOS2	1	0.0089171
127	GO:2000564	regulation of CD8-positive, alpha-beta T cell proliferation	biological process	IRF1	1	0.0089171
128	GO:0002518	lymphocyte chemotaxis across high endothelial venule	biological process	CXCL13	1	0.0089171
129	GO:0072156	distal tubule morphogenesis	biological process	KLHL3	1	0.0089171
130	GO:1901796	regulation of signal transduction by p53 class mediator	biological process	HIPK4	1	0.0089171
131	GO:2000545	negative regulation of endothelial cell chemotaxis to fibroblast growth factor	biological process	CXCL13	1	0.0089171
132	GO:0032370	positive regulation of lipid transport	biological process	LRAT	1	0.0089171
133	GO:0045590	negative regulation of regulatory T cell differentiation	biological process	IRF1	1	0.0177554
134	GO:0032765	positive regulation of mast cell cytokine production	biological process	FCER1G	1	0.0177554
135	GO:0030801	positive regulation of cyclic nucleotide metabolic process	biological process	CALM1	1	0.0177554
136	GO:0001798	positive regulation of type IIa hypersensitivity	biological process	FCER1G	1	0.0177554
137	GO:0006776	vitamin A metabolic process	biological process	LRAT	1	0.0177554
138	GO:2001212	regulation of vasculogenesis	biological process	EMP2	1	0.0177554
139	GO:2001044	regulation of integrin-mediated signaling pathway	biological process	TIMP1	1	0.0177554
140	GO:2000525	positive regulation of T cell costimulation	biological process	CCR7	1	0.0177554
141	GO:0002606	positive regulation of dendritic cell antigen processing and presentation	biological process	CCR7	1	0.0177554
142	GO:0006567	threonine catabolic process	biological process	ENSSSCG00000020981	1	0.0177554
143	GO:0002685	regulation of leukocyte migration	biological process	CXCR3	1	0.0177554
144	GO:0002283	neutrophil activation involved in immune response	biological process	FCER1G	1	0.0177554
145	GO:0000819	sister chromatid segregation	biological process	TOP2A	1	0.0177554
146	GO:0003093	regulation of glomerular filtration	biological process	EMP2	1	0.0177554
147	GO:0010594	regulation of endothelial cell migration	biological process	EMP2	1	0.0177554
148	GO:0051343	positive regulation of cyclic-nucleotide phosphodiesterase activity	biological process	CALM1	1	0.0177554
149	GO:0046168	glycerol-3-phosphate catabolic process	biological process	ENSSSCG00000000214	1	0.0177554
150	GO:0034124	regulation of MyD88-dependent toll-like receptor signaling pathway	biological process	IRF1	1	0.0177554
151	GO:0060316	positive regulation of ryanodine-sensitive calcium-release channel activity	biological process	CALM1	1	0.0177554
152	GO:0002408	myeloid dendritic cell chemotaxis	biological process	CCR7	1	0.0177554
153	GO:0030263	apoptotic chromosome condensation	biological process	TOP2A	1	0.0177554
154	GO:0060333	interferon-gamma-mediated signaling pathway	biological process	IRF1	1	0.0177554
155	GO:0072539	T-helper 17 cell differentiation	biological process	BATF	1	0.0177554
156	GO:0001812	positive regulation of type I hypersensitivity	biological process	FCER1G	1	0.0177554
157	GO:0034445	negative regulation of plasma lipoprotein particle oxidation	biological process	APOM	1	0.0177554
158	GO:1902268	negative regulation of polyamine transmembrane transport	biological process	OAZ2	1	0.0177554
159	GO:0002361	CD4-positive, CD25-positive, alpha-beta regulatory T cell differentiation	biological process	PLA2G2D	1	0.0177554
160	GO:0001805	positive regulation of type III hypersensitivity	biological process	FCER1G	1	0.0177554
161	GO:0038094	Fc-gamma receptor signaling pathway	biological process	FCER1G	1	0.0177554
162	GO:0044774	mitotic DNA integrity checkpoint	biological process	TOP2A	1	0.0177554
163	GO:0070487	monocyte aggregation	biological process	CD44	1	0.0177554
164	GO:0033625	positive regulation of integrin activation	biological process	CXCL13	1	0.0177554
165	GO:0050801	ion homeostasis	biological process	KLHL3	1	0.0177554
166	GO:0009838	abscission	biological process	CHMP4C	1	0.0177554
167	GO:0010756	positive regulation of plasminogen activation	biological process	CLEC3B	1	0.0177554
168	GO:0051712	positive regulation of killing of cells of other organism	biological process	NOS2	1	0.0265155
169	GO:0006266	DNA ligation	biological process	TOP2A	1	0.0265155
170	GO:0097029	mature conventional dendritic cell differentiation	biological process	CCR7	1	0.0265155
171	GO:0070294	renal sodium ion absorption	biological process	KLHL3	1	0.0265155
172	GO:1903142	positive regulation of establishment of endothelial barrier	biological process	S1PR2	1	0.0265155
173	GO:0032827	negative regulation of natural killer cell differentiation involved in immune response	biological process	PGLYRP2	1	0.0265155
174	GO:0045661	regulation of myoblast differentiation	biological process	FLOT2	1	0.0265155
175	GO:0044117	growth of symbiont in host	biological process	PGLYRP2	1	0.0265155
176	GO:0043549	regulation of kinase activity	biological process	EMP2	1	0.0265155
177	GO:0070252	actin-mediated cell contraction	biological process	EMP2	1	0.0265155
178	GO:1900625	positive regulation of monocyte aggregation	biological process	CD44	1	0.0265155
179	GO:0042590	antigen processing and presentation of exogenous peptide antigen via MHC class I	biological process	FCER1G	1	0.0265155
180	GO:1901164	negative regulation of trophoblast cell migration	biological process	TIMP1	1	0.0265155
181	GO:0043374	CD8-positive, alpha-beta T cell differentiation	biological process	IRF1	1	0.0265155
182	GO:0050792	regulation of viral process	biological process	CHMP4C	1	0.0265155
183	GO:1900015	regulation of cytokine production involved in inflammatory response	biological process	NOS2	1	0.0265155
184	GO:0072606	interleukin-8 secretion	biological process	NOS2	1	0.0265155
185	GO:0002819	regulation of adaptive immune response	biological process	CD48	1	0.0265155
186	GO:0035754	B cell chemotaxis	biological process	CXCL13	1	0.0265155
187	GO:0050920	regulation of chemotaxis	biological process	CXCR4	1	0.0265155
188	GO:1900271	regulation of long-term synaptic potentiation	biological process	PAIP2	1	0.0265155
189	GO:0010831	positive regulation of myotube differentiation	biological process	MAML1	1	0.0265155
190	GO:0051149	positive regulation of muscle cell differentiation	biological process	MAML1	1	0.0351981
191	GO:0010543	regulation of platelet activation	biological process	FCER1G	1	0.0351981
192	GO:0006527	arginine catabolic process	biological process	NOS2	1	0.0351981
193	GO:0045064	T-helper 2 cell differentiation	biological process	BATF	1	0.0351981
194	GO:0060054	positive regulation of epithelial cell proliferation involved in wound healing	biological process	MMP12	1	0.0351981
195	GO:0033634	positive regulation of cell-cell adhesion mediated by integrin	biological process	CXCL13	1	0.0351981
196	GO:0030214	hyaluronan catabolic process	biological process	CD44	1	0.0351981
197	GO:0008635	activation of cysteine-type endopeptidase activity involved in apoptotic process by cytochrome c	biological process	ENSSSCG00000000884	1	0.0351981
198	GO:0002320	lymphoid progenitor cell differentiation	biological process	BATF	1	0.0351981
199	GO:0045084	positive regulation of interleukin-12 biosynthetic process	biological process	IRF1	1	0.0351981
200	GO:0010039	response to iron ion	biological process	CYBRD1	1	0.0351981
201	GO:0006595	polyamine metabolic process	biological process	OAZ2	1	0.0351981
202	GO:0072540	T-helper 17 cell lineage commitment	biological process	BATF	1	0.0351981
203	GO:2001046	positive regulation of integrin-mediated signaling pathway	biological process	EMP2	1	0.0351981
204	GO:0090611	ubiquitin-independent protein catabolic process via the multivesicular body sorting pathway	biological process	CHMP4C	1	0.0351981
205	GO:0071404	cellular response to low-density lipoprotein particle stimulus	biological process	FCER1G	1	0.0351981
206	GO:0050778	positive regulation of immune response	biological process	FCER1G	1	0.0351981
207	GO:0071169	establishment of protein localization to chromatin	biological process	HIST1H1B	1	0.0351981
208	GO:0030261	chromosome condensation	biological process	TOP2A	1	0.0351981
209	GO:0090394	negative regulation of excitatory postsynaptic potential	biological process	S1PR2	1	0.0351981
210	GO:0070345	negative regulation of fat cell proliferation	biological process	E2F3	1	0.0351981
211	GO:0045576	mast cell activation	biological process	FCER1G	1	0.0438039
212	GO:0007221	positive regulation of transcription of Notch receptor target	biological process	MAML1	1	0.0438039
213	GO:0043534	blood vessel endothelial cell migration	biological process	EMP2	1	0.0438039
214	GO:0034116	positive regulation of heterotypic cell-cell adhesion	biological process	CD44	1	0.0438039
215	GO:0032466	negative regulation of cytokinesis	biological process	CHMP4C	1	0.0438039
216	GO:0042446	hormone biosynthetic process	biological process	ENSSSCG00000028896	1	0.0438039
217	GO:0016045	detection of bacterium	biological process	PGLYRP2	1	0.0438039
218	GO:0034384	high-density lipoprotein particle clearance	biological process	APOM	1	0.0438039
219	GO:2000510	positive regulation of dendritic cell chemotaxis	biological process	CCR7	1	0.0438039
220	GO:0034380	high-density lipoprotein particle assembly	biological process	APOM	1	0.0438039
221	GO:0046847	filopodium assembly	biological process	S1PR2	1	0.0438039
222	GO:0006072	glycerol-3-phosphate metabolic process	biological process	ENSSSCG00000000214	1	0.0438039
223	GO:0018119	peptidyl-cysteine S-nitrosylation	biological process	NOS2	1	0.0438039
224	GO:0006809	nitric oxide biosynthetic process	biological process	NOS2	1	0.0438039
225	GO:0002221	pattern recognition receptor signaling pathway	biological process	PGLYRP2	1	0.0438039
226	GO:0009253	peptidoglycan catabolic process	biological process	PGLYRP2	1	0.0438039
227	GO:0038095	Fc-epsilon receptor signaling pathway	biological process	FCER1G	1	0.0438039
228	GO:0061154	endothelial tube morphogenesis	biological process	RHOB	1	0.0438039
229	GO:0006751	glutathione catabolic process	biological process	GGT5	1	0.0438039
230	GO:0006616	SRP-dependent cotranslational protein targeting to membrane, translocation	biological process	ENSSSCG00000008900	1	0.0438039
231	GO:0003376	sphingosine-1-phosphate signaling pathway	biological process	S1PR2	1	0.0438039
232	GO:0035313	wound healing, spreading of epidermal cells	biological process	MMP12	1	0.0438039
